# Supplementary material
Source: PubMed Central journal article supplement (PMC3055314)

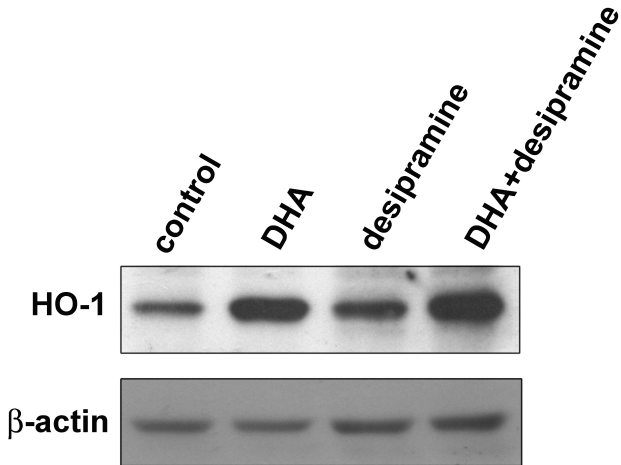

**Figure S4**

Supplement: npp201098x4.pdf [file npp201098x4.pdf]
